# Supplementary material
Source: PubMed Central journal article supplement (PMC7895443)
Supplement: NIHMS1668406-supplement-Appendix_2.pdf [file NIHMS1668406-supplement-Appendix_2.pdf]

## Appendix B: Food Allergy Independent Measure (FAIM) Questions

*How big do you think the chance is that your child...*

1. Will accidentally eat something to which he/she is allergic?
2. Will have a **severe** reaction if he/she accidentally eats something to which he/she is allergic?
3. Will die if he/she accidentally eats something to which he/she is allergic?
4. **Cannot** do the right things for [his/her] allergic reaction (or have the right things done by others) should [he/she] accidentally eat something to which [he/she] is allergic

- Never (0% chance)
- Very small chance
- Small chance
- Fair chance
- Big chance
- Very big chance
- Always (100% chance)

5. How many products must your child avoid because of his/her food allergy?

- Almost none
- Very few
- A few
- Some
- Many
- Very many
- Almost all

6. Everyone does things with other people, such as: playing with friends, going to a birthday party, visiting, staying over with someone for a meal or eating out.

How much does your child's food allergy affect the things you do with others?

- So little he/she doesn't actually notice it
- Very little
- Moderately
- A good deal
- A great deal
- A very great deal
