# Supplementary material
Source: PubMed Central journal article supplement (PMC7895443)
Supplement: NIHMS1668406-supplement-Supplemental_table_1.pdf [file NIHMS1668406-supplement-Supplemental_table_1.pdf]

## SUPPLEMENTAL TABLES

**Table E1. Symptoms Associated with Allergic Reaction to Egg**

|                                                         | Reaction Symptoms:<br>Children with Egg<br>Allergy | Reaction Symptoms:<br>Children with Egg<br>allergy and Baked<br>Egg Tolerance | Reaction Symptoms:<br>Children with Egg<br>Allergy without Baked<br>Egg Tolerance | P-value |
|---------------------------------------------------------|----------------------------------------------------|-------------------------------------------------------------------------------|-----------------------------------------------------------------------------------|---------|
| Any Stringent<br>Skin/Oral/Mucosal<br>Tissue Symptom(s) | 58.2 (46.8-68.8)                                   | 64.9 (55.7-73.1)                                                              | 46.3 (26.1-67.7)                                                                  | 0.12    |
| <i>Hives</i>                                            | 49.7 (39.4-60.0)                                   | 57.3 (47.8-66.2)                                                              | 36.2 (20.5-55.4)                                                                  | 0.05    |
| Itching                                                 | 49.9 (39.6-60.3)                                   | 52.4 (42.7-61.9)                                                              | 45.8 (25.8-67.3)                                                                  | 0.6     |
| Rash                                                    | 38.3 (29.7-47.6)                                   | 36.9 (28.3-46.4)                                                              | 40.6 (22.9-61.1)                                                                  | 0.74    |
| <i>Swelling</i>                                         | 21.8 (14.6-31.2)                                   | 23.0 (13.9-35.6)                                                              | 19.6 (10.3-34.2)                                                                  | 0.68    |
| Lip/tongue swelling                                     | 19.1 (12.5-28.0)                                   | 21.5 (13.0-33.4)                                                              | 15.0 (7.6-27.5)                                                                   | 0.38    |
| <i>Difficulty swallowing</i>                            | 13.7 (9.8-18.8)                                    | 14.7 (10.1-20.8)                                                              | 12.1 (6.3-22.1)                                                                   | 0.6     |
| Hoarse voice                                            | 9.1 (5.8-13.9)                                     | 8.9 (5.3-14.4)                                                                | 9.5 (4.0-20.9)                                                                    | 0.89    |
| Itchy mouth                                             | 14.1 (8.3-23.0)                                    | 15.3 (7.6-28.4)                                                               | 11.9 (6.2-21.6)                                                                   | 0.59    |
| <i>Throat tightening</i>                                | 10.2 (6.9-15.0)                                    | 9.1 (5.7-14.2)                                                                | 12.4 (5.8-24.2)                                                                   | 0.49    |
| Mouth or throat<br>tingling                             | 12.6 (6.7-12.4)                                    | 11.3 (4.4-25.8)                                                               | 14.5 (6.1-30.8)                                                                   | 0.68    |
| Any Stringent<br>Respiratory<br>Symptom(s)              | 21.1 (15.4-28.2)                                   | 20.5 (14.4-28.4)                                                              | 22.2 (11.9-37.8)                                                                  | 0.82    |
| Chest tightening                                        | 5.0 (3.1-7.7)                                      | 5.6 (3.4-9.2)                                                                 | 3.8 (1.5-9.5)                                                                     | 0.47    |
| Nasal congestion                                        | 16.0 (9.8-24.9)                                    | 15.4 (7.8-28.3)                                                               | 16.6 (8.4-30.4)                                                                   | 0.87    |
| Repetitive cough                                        | 11.0 (5.7-20.1)                                    | 11.0 (4.2-25.6)                                                               | 11.2 (5.5-21.4)                                                                   | 0.98    |
| Trouble breathing                                       | 10.2 (6.8-15.1)                                    | 9.6 (6.1-15.0)                                                                | 11.4 (5.2-23.1)                                                                   | 0.71    |
| Wheezing                                                | 12.3 (8.1-18.4)                                    | 11.1 (6.3-18.8)                                                               | 14.7 (7.3-27.4)                                                                   | 0.52    |
| Any Stringent<br>Gastrointestinal<br>Symptom(s)         | 31.3 (20.7-44.4)                                   | 24.9 (17.8-33.6)                                                              | 42.8 (20.5-68.4)                                                                  | 0.16    |
| Belly pain                                              | 22.6 (12.4-37.6)                                   | 15.9 (10.6-23.2)                                                              | 34.3 (12.6-65.4)                                                                  | 0.14    |
| Cramps                                                  | 21.7 (11.7-36.9)                                   | <b>13.8 (9.7-19.3)</b>                                                        | <b>36.2 (14.2-66.0)</b>                                                           | 0.049   |
| Diarrhea                                                | 28.2 (17.6-41.8)                                   | 22.7 (16.1-31.1)                                                              | 37.8 (15.7-66.5)                                                                  | 0.25    |
| Nausea                                                  | 24.8 (14.5-39.2)                                   | <b>16.4 (11.3-23.0)</b>                                                       | <b>40.3 (18.0-67.5)</b>                                                           | 0.04    |
| <i>Vomiting</i>                                         | 31.3 (20.7-44.4)                                   | 24.9 (17.8-33.6)                                                              | 42.8 (20.5-68.4)                                                                  | 0.16    |
| Any Stringent<br>Cardiovascular<br>Symptom(s)           | 17.0 (12.0-23.6)                                   | 15.4 (10.9-21.4)                                                              | 19.6 (9.4-36.6)                                                                   | 0.82    |
| Chest pain                                              | 3.7 (2.3-6.0)                                      | 3.9 (2.1-7.1)                                                                 | 3.5 (1.6-7.5)                                                                     | 0.84    |
| Rapid heart rate                                        | 6.1 (3.6-10.3)                                     | 4.7 (2.7-7.9)                                                                 | 8.3 (3.1-20.6)                                                                    | 0.31    |
| Fainting/dizziness                                      | 8.2 (4.8-13.6)                                     | 7.8 (4.8-12.5)                                                                | 8.9 (2.8-25.0)                                                                    | 0.83    |
| Low blood pressure                                      | 3.6 (1.1-10.6)                                     | <b>1.0 (0.2-4.6)</b>                                                          | <b>8.3 (2.1-27.4)</b>                                                             | 0.02    |
