# Supplementary material
Source: PubMed Central journal article supplement (PMC7895443)
Supplement: NIHMS1668406-supplement-Supplemental_table_2.pdf [file NIHMS1668406-supplement-Supplemental_table_2.pdf]

**Table E2. Egg Allergy Severity amongst those with and without Baked Egg Tolerance**

| Egg allergy characteristics                   | Egg-allergic Children<br>without Baked Egg<br>Tolerance<br>(95% CI) | Egg-allergic Children<br>with Baked Egg<br>Tolerance<br>(95% CI) | P-value |
|-----------------------------------------------|---------------------------------------------------------------------|------------------------------------------------------------------|---------|
| Severe reaction to egg *                      | 28.7<br>(16.1-45.9)                                                 | 27.7<br>(20.7-36.0)                                              | 0.90    |
| Physician-confirmed Egg Allergy               | 75.1<br>(56.7-87.4)                                                 | 70.7<br>(62.0-78.0)                                              | 0.63    |
| Multiple Allergies                            | 81.8<br>(69.0-90.1)                                                 | 72.4<br>(64.3-79.2)                                              | 0.18    |
| Current EAI prescription                      | 48.2<br>(27.1-69.9)                                                 | 52.8<br>(43.0-62.4)                                              | 0.72    |
| Lifetime ED Visit                             | 69.2<br>(51.4-82.7)                                                 | 49.3<br>(39.6-59.1)                                              | 0.05    |
| Last 12 month ED Visit                        | 45.8<br>(23.4-70.0)                                                 | 30.7<br>(21.6-41.6)                                              | 0.26    |
| Has treated egg-allergic reaction<br>with EAI | 25.5<br>(14.1-41.7)                                                 | 23.4<br>(14.9-34.8)                                              | 0.81    |

\*A severe reaction consisted of a parent report of at least 2 stringent symptoms from 2 different body systems during a child's most severe reaction to a given food.

EAI: Epinephrine Auto Injector

ED: Emergency Department
